# Supplementary material for: Digital readiness among 3,555 individuals with hip or knee osteoarthritis initiating a supervised education and exercise therapy program: a cross-sectional study
Source: Research Square preprint supplement (doi:10.21203/rs.3.rs-6312226/v1), 2025-04-07
Supplement: Supplementary file 1 [file 348cec7959e98b4e1fc1ea84.docx]

**Supplementary Material**

To the paper **Digital Readiness among 3,555 Individuals with Hip or Knee Osteoarthritis Initiating a Supervised Education and Exercise Therapy Program – a cross-sectional study**

[**Supplementary Table 1. Reporting checklist for cross-sectional study following the Strengthening the Reporting of Observational Studies in Epidemiology (STROBE) guidelines**](#_Toc193809266)

[**Supplementary Table 2. Description of the seven items in the eHealth Readiness Scale**](#_Toc193809267)

[**Translation discrepancies and resolutions of the Danish version of the eHealth Readiness Scale**](#_Toc193809268)

[**Supplementary Material Table 3. Variance inflation factors (VIF) for variables included in the multinomial logistic regression model**](#_Toc193809269)

[**Suplementary Table 4. Nonresponders analysis**](#_Toc193809270)

[**Supplementary material Table 5. Reliability of the eHealth Readiness scale**](#_Toc193809271)

[**Supplementary material Table 6. Interitem correlations of the eHealth Readiness scale**](#_Toc193809272)

[**Supplementary material Table 7. Latent class numbers and proportions**](#_Toc193809273)

[**Supplementary material Table 8. Average latent lass probabilities for most likely latent class membership of model 1**](#_Toc193809274)

[**Supplementary material Table 9. Average latent class probabilities for most likely latent class membership of model 2**](#_Toc193809275)

[**Supplementary material Table 10. Average latent class probabilities for most likely latent class membership of model 3**](#_Toc193809276)

[**Supplementary Table 11. Multinomial logistic regression of potential confounders associated with low vs. high digital readiness profiles**](#_Toc193809277)

[**Supplementary Table 12. Multinomial logistic regression analysis of potential confounders associated with the intermediate digital readiness profile**](#_Toc193809278)

[**Supplementary Table 13. Multinomial logistic regression analysis of potential confounders associated with the low digital readiness profile**](#_Toc193809279)

[**Supplementary Table 14: Chi test of digital readiness profile and sex**](#_Toc193809280)

[**Supplementary Table 15. Interaction analyses between age, sex, body mass index (BMI), and education in association with the low digital readiness profile vs high**](#_Toc193809281)

[**Supplementary Table 16: Interaction analyses between age, sex, body mass index (BMI), and education in association with the intermediate digital readiness profile vs high**](#_Toc193809282)

[**Supplementary Table 17: Interaction analyses between age, sex, body mass index (BMI), and education in association with the low digital readiness profile vs intermediate**](#_Toc193809283)

# Supplementary Table 1. Reporting checklist for cross-sectional study following the Strengthening the Reporting of Observational Studies in Epidemiology (STROBE) guidelines

# Supplementary Table 2. Description of the seven items in the eHealth Readiness Scale

| **Item 1** | I would be comfortable using an internet-connected device several times a week to participate in a lifestyle intervention | Jeg ville føle mig tryg ved at anvende en internetforbundet enhed flere gange om ugen for at deltage i en online livsstilsintervention |
| --- | --- | --- |
| **Item 2** | I feel that my previous experiences with online technologies are important to my success with using a lifestyle intervention | Jeg føler at mine tidligere erfaringer med online teknologi har betydning for, om jeg opnår succes med at deltage i en online livsstilsintervention |
| **Item 3** | Using internet technologies makes me more efficient in my daily functioning | Anvendelse af internetteknologier gør, at jeg mere effektivt kan udføre dagligdagsfunktioner |
| **Item 4** | I believe that I am able to make good use of internet websites and web applications | Jeg synes jeg kan gøre god brug af internet hjemmesider og web programmer (apps) |
| **Item 5** | Using internet technologies provide me with a feeling of independence | Anvendelse af internetteknologier giver mig en følelse af uafhængighed |
| **Item 6** | I enjoy the challenge of figuring out the different functions of websites and web applications | Jeg kan godt lide udfordring ved finde ud af hvordan forskellige funktioner på internet hjemmesider og web programmer (apps) virker |
| **Item 7** | I use an internet connected device to keep track of my lifestyle (e.g., daily tasks, goals, and meetings) | Jeg anvender en internetforbundet enhed til at holde styr på min livsstil (fx dagens opgaver, mål og møder) |

For the complete version of the eHealth readiness Scale, please contact Dr. Arjun Bhalla, see publication:

Bhalla A, Durham RL, Al-Tabaa N, Yeager C. The development and initial psychometric validation of the eHealth readiness scale. Computers in Human Behavior. 2016 Dec 1;65:460–7.

# Translation discrepancies and resolutions of the Danish version of the eHealth Readiness Scale

The main comment from the patient partners was if the introduction text was needed or if each item could be changed to incorporate this text to avoid sounding too academic. However, this was not accommodated to stay true to the original questionnaire. There were a few translation discrepancies and suggestions from the patient partners in items 1, 2, 4, and 6. One issue the Danish translator raised was using a Danish translation of the word ' web application' (used in the introduction text, items 4 and 6). This can be translated into Danish, but the original English word could also be used, so a compromise was chosen (i.e., *web programmer (apps)*). For item 1 (*I would be comfortable using an internet-connected device several times a week to participate in a lifestyle intervention online*), back translating meant that the item had more of an imperative 'having to use' instead of 'using' and the Danish wording was changed to reflect this. In item 2 (*I feel that my previous experiences with online technologies are important to my success using a lifestyle intervention online*), 'I feel' was left out in the forward translation but added in the final version to stay true to the original item. In the translation of item 6 (*I enjoy the challenge of figuring out the different functions of websites and web applications*), the English translator questioned whether the Danish translation implied more of a challenge instead of a more neutral tone, but the translation was kept as no other Danish word for 'challenge' was found more neutral. For the response categories, partly agree/disagree was chosen in Danish instead of mildly, as this is often used in Danish surveys.

# Supplementary Material Table 3. Variance inflation factors (VIF) for variables included in the multinomial logistic regression model

| Variable | VIF | 1/VIF |
| --- | --- | --- |
| Age at first visit (per 10-year increase) | 1.43 | 0.700878 |
| Sex, male (ref. female) | 1.1 | 0.907564 |
| Born in Denmark (ref. yes) | 1.47 | 0.681018 |
| Danish citizenship (ref. yes) | 1.47 | 0.682579 |
| Upper secondary education | 2.97 | 0.33674 |
| Higher education | 3.08 | 0.325123 |
| Cohabitate status, living alone (ref. living with others) | 1.07 | 0.934033 |
| Preobese | 1.58 | 0.6337 |
| Obese (class I, II, or III) | 1.84 | 0.544396 |
| Self-reported most affected joint, hip (ref. knee) | 1.08 | 0.928508 |
| Bilateral symptoms (ref. no) | 1.09 | 0.915159 |
| Symptoms length of most affected joint in months | 1.03 | 0.972342 |
| Hip or knee pain during the last week (per 10-point increase) | 1.95 | 0.512517 |
| Taking pain medications (ref. no) | 1.2 | 0.836469 |
| Number of comorbidities | 1.2 | 0.836763 |
| Compliant with WHO's minimum recommendations for physical activity (ref. noncompliant) | 1.06 | 0.945701 |
| Nonsedentary behavior (ref. sedentary (sitting >9 h/day) | 1.03 | 0.96886 |
| KOOS 12/HOOS 12 summary score (per 10-point increase) | 2.21 | 0.452322 |
| EQ-5D VAS (per 10-point increase) | 1.37 | 0.730611 |
| Number of stands (30-second chair stand test) | 1.47 | 0.681858 |
| Walking speed meters per second (40-meter walk test) | 1.81 | 0.551904 |
| Mean VIF | 1.55 |  |

# Suplementary Table 4. Nonresponders analysis

| Factor | Responders | Nonresponders |
| --- | --- | --- |
| Sample, n (%) | 3555 | 1221 |
| Age at first visit, mean (SD) | 66.4 (9.6) | 67.3 (11.0) |
| Sex, n (%) |  |  |
| Female | 2386 (67.1%) | 838 (68.6%) |
| Male | 1169 (32.9%) | 383 (31.4%) |
| BMI, mean (SD) | 28.7 (5.5) | 28.5 (5.6) |
| BMI category (collapsed), n (%) |  |  |
| Underweight/normal weight | 942 (26.5%) | 341 (27.9%) |
| Preobese | 1351 (38.0%) | 456 (37.3%) |
| Obese (class I, II, or III) | 1215 (34.2%) | 394 (32.3%) |
| Missing | 47 (1.3%) | 30 (2.5%) |
| Physio assessed most affected joint, n (%) |  |  |
| Knee | 2361 (66.4%) | 865 (70.8%) |
| Hip | 1194 (33.6%) | 356 (29.2%) |
| Symptoms length of most affected joint in months, median (IQR) | 12.0 (6.0-27.0) | 12.0 (5.0-24.0) |
| Intake of pain medications, n (%) |  |  |
| No | 1278 (35.9%) | 449 (36.8%) |
| Yes | 2277 (64.1%) | 772 (63.2%) |
| Number of stands (30 seconds chair stand test), mean (SD) | 11.9 (4.2) | 11.0 (4.1) |
| Walking speed meters per second (40 meters walk test), mean (SD) | 1.5 (0.4) | 1.4 (0.4) |
| Using walking aids during the 40 meters walk test, n (%) |  |  |
| Yes | 55 (1.5%) | 46 (3.8%) |
| No | 3280 (92.3%) | 1060 (86.8%) |
| Missing | 220 (6.2%) | 115 (9.4%) |
| E-mail contact, n (%) |  |  |
| No | 21 (0.6%) | 106 (8.7%) |
| Yes | 3534 (99.4%) | 1115 (91.3%) |

# Supplementary material Table 5. Reliability of the eHealth Readiness scale

| Item | Observations | Item-test correlation | Item-rest correlation | Average interitem covariance | Cronbach's alpha |
| --- | --- | --- | --- | --- | --- |
| Item 1 | 3,555 | 0.7828 | 0.6954 | 0.5654 | 0.8864 |
| Item 2 | 3,555 | 0.7393 | 0.6385 | 0.5814 | 0.8929 |
| Item 3 | 3,555 | 0.8356 | 0.7661 | 0.5459 | 0.8782 |
| Item 4 | 3,555 | 0.8365 | 0.7674 | 0.5456 | 0.8781 |
| Item 5 | 3,555 | 0.8497 | 0.7854 | 0.5407 | 0.8760 |
| Item 6 | 3,555 | 0.7796 | 0.6911 | 0.5666 | 0.8869 |
| Item 7 | 3,555 | 0.7105 | 0.6015 | 0.5921 | 0.8970 |
| Test scale | 3,555 |  |  | 0.5625 | 0.9000 |

# Supplementary material Table 6. Interitem correlations of the eHealth Readiness scale

| Items | Item 1 | Item 2 | Item 3 | Item 4 | Item 5 | Item 6 | Item 7 |
| --- | --- | --- | --- | --- | --- | --- | --- |
| Item 1 | 1.0000 |  |  |  |  |  |  |
| Item 2 | 0.6083 | 1.0000 |  |  |  |  |  |
| Item 3 | 0.6289 | 0.6061 | 1.0000 |  |  |  |  |
| Item 4 | 0.5946 | 0.5087 | 0.6453 | 1.0000 |  |  |  |
| Item 5 | 0.5746 | 0.5313 | 0.6758 | 0.7381 | 1.0000 |  |  |
| Item 6 | 0.4904 | 0.4520 | 0.5549 | 0.6155 | 0.6564 | 1.0000 |  |
| Item 7 | 0.4353 | 0.3851 | 0.5133 | 0.5272 | 0.5260 | 0.5451 | 1.0000 |
| Interitem correlations (reverse applied) (3,555 observations in all pairs) | | | | | | | |

# Supplementary material Table 7. Latent class numbers and proportions

| Model and profile numbers | Latent Classes/profiles (higher class/profile number equals higher readiness) | | | | | Entropy |
| --- | --- | --- | --- | --- | --- | --- |
| Model 1 with 3 profiles (proportion) | 740 (0.2816) | 1528 (0.42982) | 1287 (0.36203) |  |  | 0.873 |
| Model 2 with 4 profiles (proportion) | 310 (0.0872) | 966 (0.27173) | 1740 (0.48945) | 539 (0.15162) |  | 0.900 |
| Model 3 with 5 profiles (proportion) | 324 (0.09114) | 498 (0.14008) | 1175 (0.33052) | 1094 (0.30774) | 464 (0.13052) | 0.880 |

# Supplementary material Table 8. Average latent lass probabilities for most likely latent class membership of model 1

| Model 1 with 3 profiles | | | |
| --- | --- | --- | --- |
| Profiles | **1** | **2** | **3** |
| 1 | 0.958 | 0.027 | 0.004 |
| 2 | 0.038 | 0.935 | 0.038 |
| 3 | 0.004 | 0.053 | 0.943 |

# Supplementary material Table 9. Average latent class probabilities for most likely latent class membership of model 2

| Model 2 with 4 profiles | | | | |
| --- | --- | --- | --- | --- |
| Profiles | **1** | **2** | **3** | **4** |
| 1 | 0.968 | 0.024 | 0.005 | 0.004 |
| 2 | 0.014 | 0.934 | 0.052 | 0.018 |
| 3 | 0.001 | 0.036 | 0.945 | 0.000 |
| 4 | 0.003 | 0.002 | 0.041 | 0.953 |

# Supplementary material Table 10. Average latent class probabilities for most likely latent class membership of model 3

| Model 3 with 5 profiles | | | | | |
| --- | --- | --- | --- | --- | --- |
| Profiles | **1** | **2** | **3** | **4** | **5** |
| 1 | 0.955 | 0.022 | 0.016 | 0.002 | 0.004 |
| 2 | 0.009 | 0.933 | 0.050 | 0.008 | 0.001 |
| 3 | 0.003 | 0.031 | 0.908 | 0.057 | 0.001 |
| 4 | 0.01 | 0.003 | 0.057 | 0.913 | 0.026 |
| 5 | 0.001 | 0.001 | 0.004 | 0.001 | 0.944 |

# Supplementary Table 11. Multinomial logistic regression of potential confounders associated with low vs. high digital readiness profiles

| Model | Exposure Variable | Variables | Odds ratio (95% confidence interval) | % Change in odds ratio |
| --- | --- | --- | --- | --- |
| Adjusted model | **Age (10-year)** | **All (see Table 2)** | **1.96 (1.71-2.24)** | **-** |
| Unadjusted model |  | Without sex, BMI, and educational level | 1.90 (1.67-2.16) | 3.1% |
| Model 1 |  | Adding sex | 1.95 (1.71-2.21) | -0.5% |
| Model 2 |  | Adding BMI | 1.85 (1.62-2.11) | -5.6% |
| Model 3 |  | Adding educational level | 1.95 (1.71-2.21) | -0.5% |
| Adjusted model | **Sex (male)** | **All (see Table 2)** | **0.72 (0.44-1.65)** | **-** |
| Unadjusted model |  | Without age (10-year), BMI, and educational level | 0.92 (0.74-1.13) | 27.8% |
| Model 1 |  | Adding age (10-year), | 0.76 (0.61-0.95) | 5.6% |
| Model 2 |  | Adding BMI | 0.91 (0.74-1.13) | 26.4% |
| Model 3 |  | Adding educational level | 0.87 (0.70-1.08) | 20.8% |
| Adjusted model | **BMI (obesity)** | **All (see Table 2)** | **0.73 (0.54-0.97)** | **-** |
| Unadjusted model |  | Without age (10-year), sex, and educational level | 0.53 (0.40-0.69) | 27.4% |
| Model 1 |  | Adding age (10-year) | 0.74 (0.56-0.99) | 1.4% |
| Model 2 |  | Adding sex | 0.53 (0.40-0.70) | 27.4% |
| Model 3 |  | Adding educational level | 0.49 (0.37-0.65) | 6.3% |
| Adjusted model | **Educational level (higher)** | **All (see Table 2)** | **0.32 (0.23-0.47)** | **-** |
| Unadjusted model |  | Without age (10-year), sex, and BMI | 0.36 (0.25-0.50) | 12.5% |
| Model 1 |  | Adding age (10-year) | 0.35 (0.25-0.49) | 9.4% |
| Model 2 |  | Adding sex | 0.35 (0.25-0.49) | 9.4% |
| Model 3 |  | Adding BMI | 0.34 (0.24-0.48) | 6.3% |
| Adjusted model | **Sedentary behavior (sitting < 9 hours/day)** | **All (see Table 2)** | **1.63 (1.32-2.02)** | **-** |
| Unadjusted model |  | Without age (10-year), sex, education, and BMI | 1.86 (1.51-2.28) | 14.1% |
| Model 1 |  | Adding age (10-year) | 1.73 (1.40-2.13) | 6.1% |
| Model 2 |  | Adding sex | 1.85 (1.51-2.28) | 13.5% |
| Model 3 |  | Adding BMI | 1.78 (1.44-2.19) | 9.2% |
| Model 4 |  | Adding educational level | 1.82 (1.48-2.24) | 11.7% |
| Reference: high digital readiness profile; variables [reference] include age [per 10-year increase], sex [male], BMI; body mass index [obesity], education [higher level], and sedentary behavior [sitting >9 hours/day] | | | | |

# Supplementary Table 12. Multinomial logistic regression analysis of potential confounders associated with the intermediate digital readiness profile

| Model | Exposure Variable | Variables | Odds ratio (95% confidence interval) | % Change in odds ratio | |
| --- | --- | --- | --- | --- | --- |
| Adjusted model | **Age (10-year)** | **All (see Table 2)** | **1.30 (1.18-1.44)** | **-** | |
| Unadjusted model |  | Without sex, BMI, and educational level | 1.26 (1.15-1.39) | -3.1% | |
| Model 1 |  | Adding sex | 1.31 (1.19-1.44) | 0.8% | |
| Model 2 |  | Adding BMI | 1.22 (1.11-1.35) | -6.2% | |
| Model 3 |  | Adding educational level | 1.29 (1.17-1.42) | -0.8% | |
| Adjusted model | **Sex (male)** | **All (see Table 2)** | **0.65 (0.55-0.78)** | **-** | |
| Unadjusted model |  | Without age (10-year), BMI, and educational level | 0.74 (0.63-0.88) | 13.8% | |
| Model 1 |  | Adding age (10-year), | 0.68 (0.58-0.81) | 4.6% | |
| Model 2 |  | Adding BMI | 0.74 (0.62-0.88) | 13.8% | |
| Model 3 |  | Adding educational level | 0.72 (0.61-0.85) | 10.8% | |
| Adjusted model | **BMI (obesity)** | **All (see Table 2)** | **0.75 (0.60-0.95)** | **-** | |
| Unadjusted model |  | Without age (10-year), sex, and educational level | 0.67 (0.54-0.83) | -10.7% | |
| Model 1 |  | Adding age (10-year), | 0.75 (0.60-0.94) | 0% | |
| Model 2 |  | Adding sex | 0.68 (0.55-0.85) | -9.3% | |
| Model 3 |  | Adding educational level | 0.64 (0.51-0.80) | 14.7% | |
| Adjusted model | **Educational level (higher)** | **All (see Table 2)** | **0.55 (0.40-0.75)** | **-** | |
| Unadjusted model |  | Without age (10-year), sex, and educational level | 0.59 (0.43-0.79) | 7.3% | |
| Model 1 |  | Adding age (10-year), | 0.58 (0.43-0.79) | 5.5% | |
| Model 2 |  | Adding sex | 0.58 (0.42-0.77) | 5.5% | |
| Model 3 |  | Adding BMI | 0.57 (0.42-0.78) | 3.6% | |
| Adjusted model | **Sedentary behavior (sitting <9 hours/day)** | **All (see Table 2)** | **1.20 (1.02-1.42)** | **-** | |
| Unadjusted model |  | Without age (10-year), sex, education, and BMI | 1.33 (1.13-1.56) | 10.8% | |
| Model 1 |  | Adding age (10-year) | 1.28 (1.09-1.50) | 6.7% | |
| Model 2 |  | Adding sex | 1.31 (1.12-1.54) | 9.2% | |
| Model 3 |  | Adding BMI | 1.28 (1.09-1.50) | 6.7% | |
| Model 4 |  | Adding educational level | 1.32 (1.12-1.55) | 10.0% | |
| Reference: high digital readiness profile; variables [reference] include age [per 10-year increase], sex [male], BMI; body mass index [obesity], education [higher level], and sedentary behavior [sitting >9 hours/day] | | | | | |

# Supplementary Table 13. Multinomial logistic regression analysis of potential confounders associated with the low digital readiness profile

| Model | Exposure Variable | Variables | Odds ratio (95% confidence interval) | % Change in odds ratio |
| --- | --- | --- | --- | --- |
| Adjusted model | **Age (10-year)** | **All (see Table 2)** | **1.50 (1.32-1.71)** | **-** |
| Unadjusted model |  | Without sex, BMI, and educational level | 1.50 (133-1.70) | 0% |
| Model 1 |  | Adding Sex | 1.49 (1.32-1.68) | -0.7% |
| Model 2 |  | Adding BMI | 1.51 (1.33-171) | 0.7% |
| Model 3 |  | Adding, educational level | 1.22 (0.99-1.50) | 18.7% |
| Adjusted model | **Sex (male)** | **All (see Table 2)** | **1.10 (0.89-1.36)** | **-** |
| Unadjusted model |  | Without age (10-year), BMI, and educational level | 1.23 (1.00-1.52) | 11.8% |
| Model 1 |  | Adding age (10-year), | 1.11 (0.90-1.38) | 0.9% |
| Model 2 |  | Adding BMI | 1.23 (1.00-1.52) | 11.8% |
| Model 3 |  | Adding educational level | 1.22 (0.99-1.50) | 11.8% |
| Adjusted model | **BMI (obesity)** | **All (see Table 2)** | **0.96 (0.73-1.26)** | **-** |
| Unadjusted model |  | Without age (10-year), sex, and educational level | 0.79 (0.61-1.01 | 17.7% |
| Model 1 |  | Adding age (10-year), | 0.99 (0.76-1.29) | 3.1% |
| Model 2 |  | Adding sex | 0.78 (0.60-1.00) | 18.8% |
| Model 3 |  | Adding educational level | 0.77 (0.60-1.00) | 20.8% |
| Adjusted model | **Educational level (higher)** | **All (see Table 2)** | **0.60 (0.44-0.81)** | **-** |
| Unadjusted model |  | Without age (10-year), sex, and educational level | 0.61 (0.45-0.82) | 1.7% |
| Model 1 |  | Adding age (10-year), | 0.60 (0.44-0.81) | 0% |
| Model 2 |  | Adding sex | 0.62 (0.46-0.83) | 3.3% |
| Model 3 |  | Adding BMI | 0.60 (0.44-0.81) | 0% |

Reference: intermediate digital readiness profile; variables [reference] include age [per 10-year increase], sex [male], BMI; body mass index [obesity], education [higher level], and sedentary behavior [sitting >9 hours/day]

# Supplementary Table 14: Chi test of digital readiness profile and sex

| Digital readiness profile | Female | Male | Total | Pearson chi2(2) |
| --- | --- | --- | --- | --- |
| Low digital readiness | 514 (69.5%) | 226 (30.5%) | 740 (100.0%) |  |
| Intermediate digital readiness | 1083 (70.9%) | 445 (29.1) | 1528 (100.0%) |  |
| High digital readiness | 789 (61.3%) | 498 (38.7%) | 1287 (100.0%) |  |
| Total | 2386 (67.1%) | 1169 (32.9%) | 3555 (100.0%) | p=<0.001 |

# Supplementary Table 15. Interaction analyses between age, sex, body mass index (BMI), and education in association with the low digital readiness profile vs high

| Interaction terms | Odds ratio (95% confidence interval) | p-value |
| --- | --- | --- |
| Age (per 10-year)* | 2.03 (1.74-2.38) | <0.001 |
| Sex (male) | 1.52 (0.27-8.66) | 0.640 |
| Sex (male)#age (per 10-year) | 0.89 (0.70-1.15) | 0.384 |
| Age (per 10-year)* | 2.12 (1.66-2.71) | <0.001 |
| BMI (preobese) | 1.04 (0.12-9.00) | 0.972 |
| BMI (obese) | 2.63 (0.32-21.81) | 0.371 |
| BMI (preobese)#age (per 10-year) | 0.97 (0.71-1.32) | 0.849 |
| BMI (obese)#age (per 10-year) | 0.83 (0.61-1.13) | 0.232 |
| Age (per 10-year) | 1.78 (0.83-1.67 | 0.363 |
| Educational level (upper secondary)* | 0.02 (0.00-0.27) | 0.004 |
| Educational level (higher)* | 0.00 (0.00-0.06) | <0.001 |
| Educational level (upper secondary)#age (per 10-year)* | 1.65 (1.13-2.42) | 0.010 |
| Educational level (higher)#age (per 10-year)* | 1.91 (1.28-2.84) | 0.001 |
| Sex (male) | 0.84 (0.55-1.28) | 0.420 |
| BMI (preobese) | 0.96 (0.70-1.32) | 0.804 |
| BMI (obese) | 0.72 (0.51-1.01) | 0.056 |
| BMI (preobese)#sex (male) | 0.67 (0.39-1.15) | 0.145 |
| BMI (obese)#sex (male) | 1.02 (0.58-1.79) | 0.945 |

Reference: High Readiness Profile
BMI; Body mass index
* indicates significant interaction

# Supplementary Table 16: Interaction analyses between age, sex, body mass index (BMI), and education in association with the intermediate digital readiness profile vs high

| Interaction terms | Odds ratio (95% confidence interval) | p-value |
| --- | --- | --- |
| Age (per 10-year)* | 1.35 (1.20-1.52) | <0.001 |
| Sex (male) | 1.41 (0.41-4.87) | 0.584 |
| Sex (male)#age (per 10-year) | 0.89 (0.74-1.07) | 0.215 |
| Age (per 10-year)* | 1.29 (1.08-1.54) | 0.005 |
| BMI (preobese) | 0.84 (0.19-3.74) | 0.817 |
| BMI (obese) | 0.65 (0.15-2.87) | 0.566 |
| BMI (preobese)#age (per 10-year) | 1.01 (0.81-1.26) | 0.928 |
| BMI (obese)#age (per 10-year) | 1.02 (0.82-1.28) | 0.843 |
| Age (per 10-year) | 0.87 (0.63-1.19) | 0.378 |
| Educational level (upper secondary)* | 0.08 (0.01-0.87) | 0.038 |
| Educational level (higher)* | 0.01 (0.00-0.12) | <0.001 |
| Educational level (upper secondary)#age (per 10-year) | 1.40 (1.00-1096) | 0.051 |
| Educational level (higher)#age (per 10-year)* | 1.77 (1.26-2.50) | 0.001 |
| BMI (preobese) | 0.97 (0.44-2.14) | 0.942 |
| BMI (obese) | 0.99 (0.44-2.21) | 0.975 |
| Educational level (upper secondary) | 0.96 (0.47-1.33) | 0.917 |
| Educational level (higher) | 0.66 (0.32-1.33) | 0.242 |
| BMI (preobese)#educational level (upper secondary) | 0.90 (0.39-2.18) | 0.817 |
| BMI (preobese)#educational level (higher) | 0.94 (0.41-2.18) | 0.888 |
| BMI (obese)#educational level (upper secondary) | 0.83 (0.35-1.97) | 0.674 |
| BMI (obese)#educational level (higher) | 0.66 (0.28-1.56) | 0.341 |

Reference: High Readiness Profile
BMI; Body mass index
* indicates significant interaction

# Supplementary Table 17: Interaction analyses between age, sex, body mass index (BMI), and education in association with the low digital readiness profile vs intermediate

| Interaction terms | Odds ratio (95% confidence interval) | p-value |
| --- | --- | --- |
| Age (per 10-year)* | 1.50 (1.30-1.74) | <0.001 |
| Sex (male) | 1.07 (0.20-5.87 | 0.936 |
| Sex (male)#age (per 10-year) | 1.01 (0.79-1.28) | 0.964 |
| Age (per 10-year)* | 1.64 (1.31-2.06) | <0.001 |
| BMI (pre-obese) | 1.24 (0.16-9.59) | 0.837 |
| BMI (obese) | 4.07 (0.54-30.49) | 0.172 |
| BMI (pre-obese)#age (per 10-year) | 0.96 (0.72-1.28) | 0.784 |
| BMI (obese)#age (per 10-year) | 0.81 (0.61-1.08) | 0.153 |
| Age (per 10-year)* | 1.36 (1.01-1.82) | 0.042 |
| Educational level (upper secondary) | 0.22 (0.02-2.23) | 0.203 |
| Educational level (higher) | 0.34 (0.03-3.95) | 0.388 |
| Educational level (upper secondary)#age (per 10-year) | 1.18 (0.85-1.63) | 0.317 |
| Educational level (higher)#age (per 10-year) | 1.08 (0.76-1.52) | 0.676 |

Reference: Intermediate Readiness Profile
BMI; Body mass index
* indicates significant interaction
